# Supplementary material for: Attitudes and Beliefs of Eastern European Consumers Towards Animal Welfare
Source: PubMed Central journal article supplement (PMC7401545; doi:10.3390/ani10071220), 2020-07-17
Supplement: animals-10-01220-s001.pdf [file animals-10-01220-s001.pdf]

Table X: Description of EU / non-EU countries regarding beliefs, willingness to pay and attitudes toward castration and meat from castrated pigs<sup>1</sup>.

|                                                                                                                                   | EU (n=3,130)           | Non-EU (n=2,254)       |
|-----------------------------------------------------------------------------------------------------------------------------------|------------------------|------------------------|
| <i>Beliefs about particular aspects of management<sup>2</sup></i>                                                                 |                        |                        |
| The animals that we consume are transported incorrectly                                                                           | 4.4                    | 4.4                    |
| Slaughter systems should be improved to avoid animal suffering                                                                    | 5.4                    | 5.4                    |
| Avoided rearing animals we consume in much reduced spaces                                                                         | <b>5.4<sup>a</sup></b> | <b>5.2<sup>b</sup></b> |
| The pigs we consume should grow in freedom                                                                                        | 4.4                    | 4.5                    |
| <i>Beliefs about ethical issues about animals<sup>2</sup></i>                                                                     |                        |                        |
| The animals that we consume should be treated with dignity                                                                        | <b>5.5<sup>a</sup></b> | <b>5.3<sup>b</sup></b> |
| Doesn't matter if we mistreat the animals because we eat them                                                                     | 2.4                    | 2.6                    |
| I am worried about welfare of animals for human consumption                                                                       | <b>4.6<sup>a</sup></b> | <b>5.0<sup>b</sup></b> |
| <i>Beliefs about consequences of animal welfare on meat<sup>2</sup></i>                                                           |                        |                        |
| Taking care of animal welfare produces meat of higher quality                                                                     | 5.4                    | 5.4                    |
| Ensuring animal welfare means to eat more expensive meat                                                                          | <b>4.0<sup>a</sup></b> | <b>4.4<sup>b</sup></b> |
| <i>Willingness to pay<sup>2</sup></i>                                                                                             |                        |                        |
| Willing to pay a little more for meat from animals treated with dignity                                                           | 4.6                    | 4.6                    |
| <i>Attitude towards animal welfare</i>                                                                                            |                        |                        |
| Treating correctly animals for human consumption is ...<br>(1) - Bad; (4) - Neither bad nor good; (7) - Good                      | <b>6.0<sup>a</sup></b> | <b>5.7<sup>b</sup></b> |
| Treating correctly the animals that we consume is...<br>(1) - Easy; (4) - Neither easy nor difficult; (7) - Difficult             | 4.2                    | 4.5                    |
| To mistreat the animals we consume is ...<br>(1) - Harmful; (4) - Neither harmful nor beneficial; (7) - Beneficial                | 2.3                    | 2.1                    |
| Humane treatment of animals for human consumption is ...<br>(1) - Natural; (4) - Neither natural nor artificial; (7) - Artificial | 2.5                    | 2.5                    |

<sup>1</sup> Same row denoted with different superscript are significantly different at the level of 5%; <sup>2</sup>(1) - Disagree very strongly; (4) Neither agree nor disagree; (7) - Agree very strongly.

EU (Bulgaria, Czech Republic, Croatia, Hungary, Poland, Romania, Slovakia, Slovenia); Non-EU (Bosnia and Herzegovina, North Macedonia, Moldova, Serbia, Ukraine)
